# Supplementary figures and images for: Diversity of Plasmids and Genes Encoding Resistance to Extended-Spectrum β-Lactamase in Escherichia coli from Different Animal Sources
Source: MDPI journal article supplement (doi:10.3390/microorganisms9051057), 2021-05-13

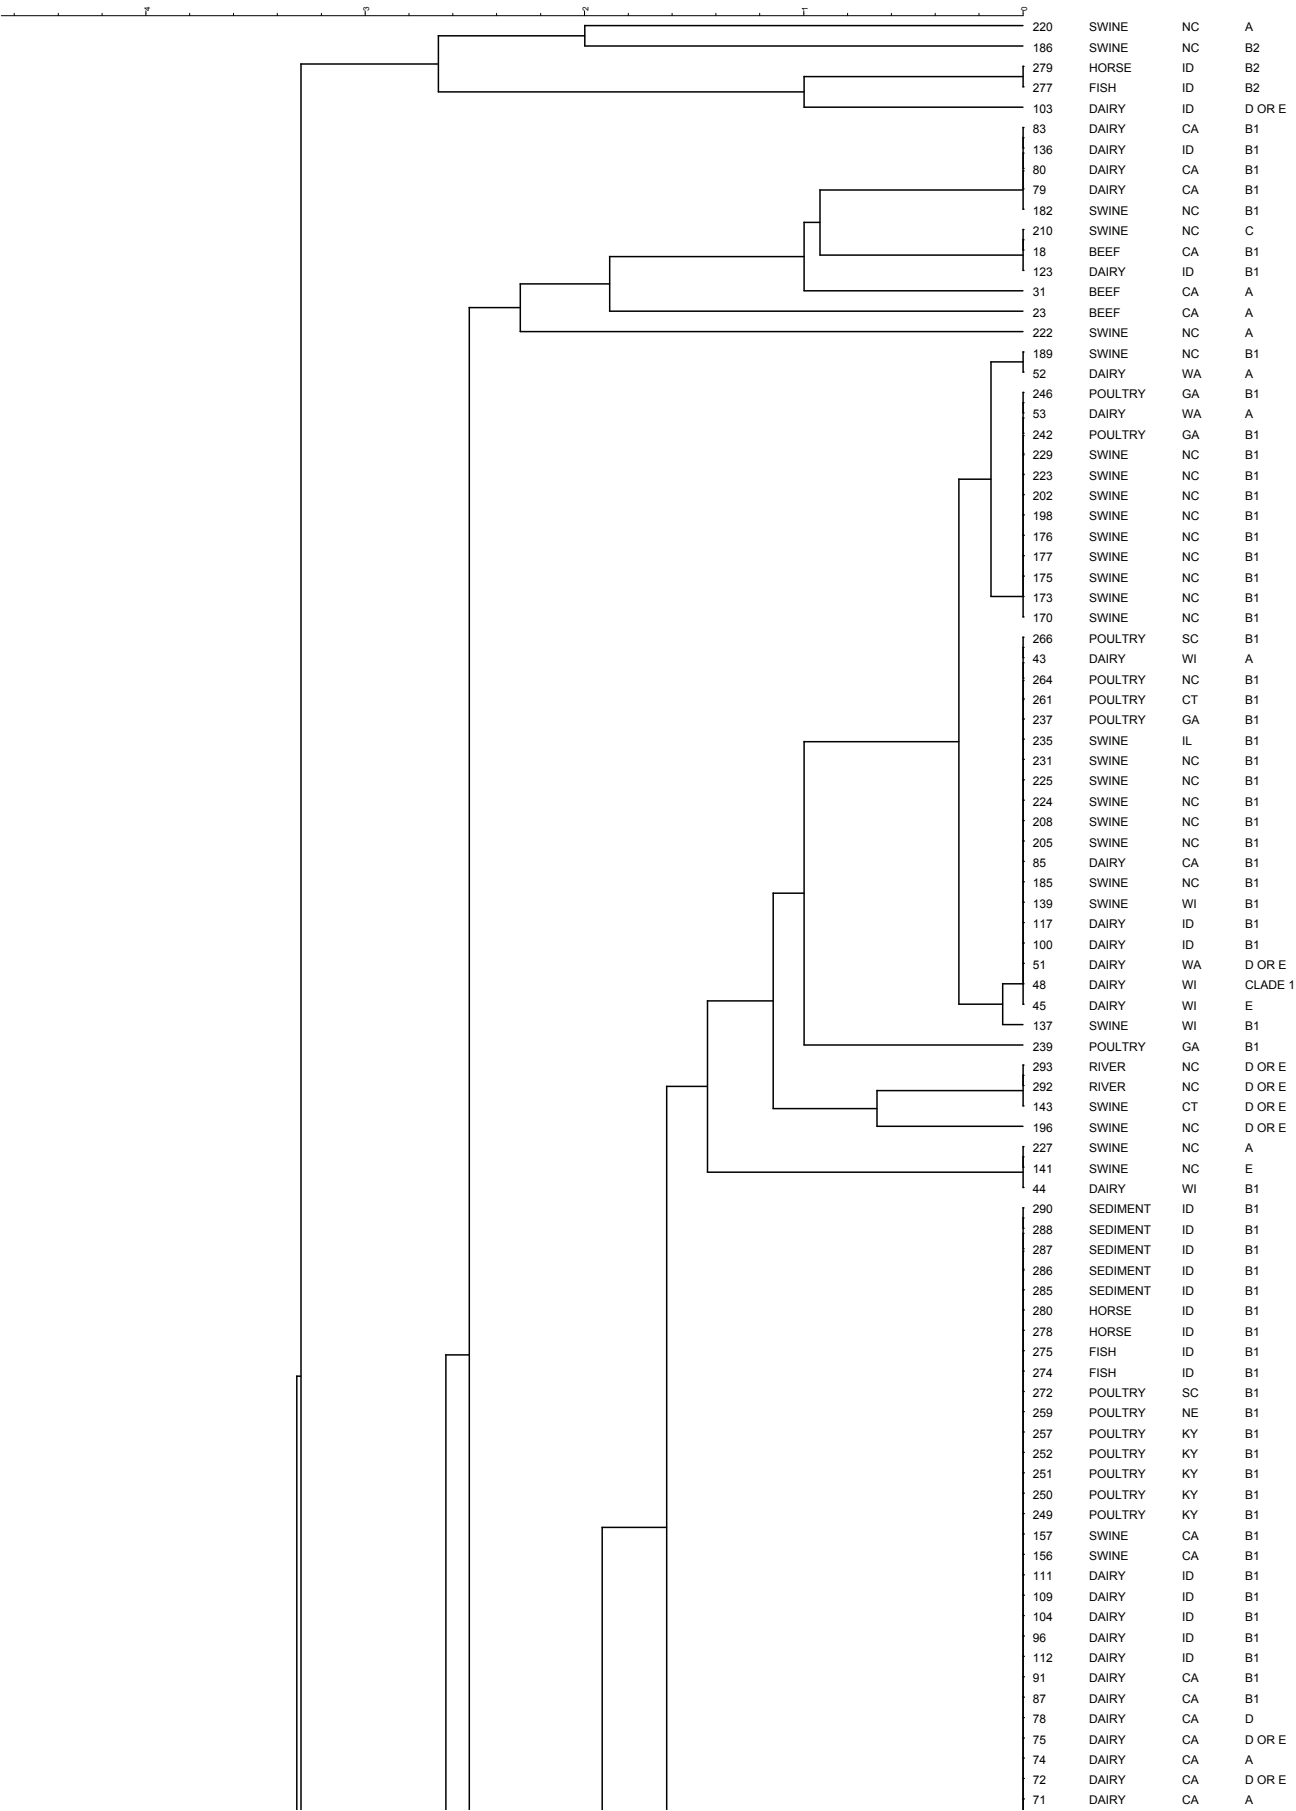

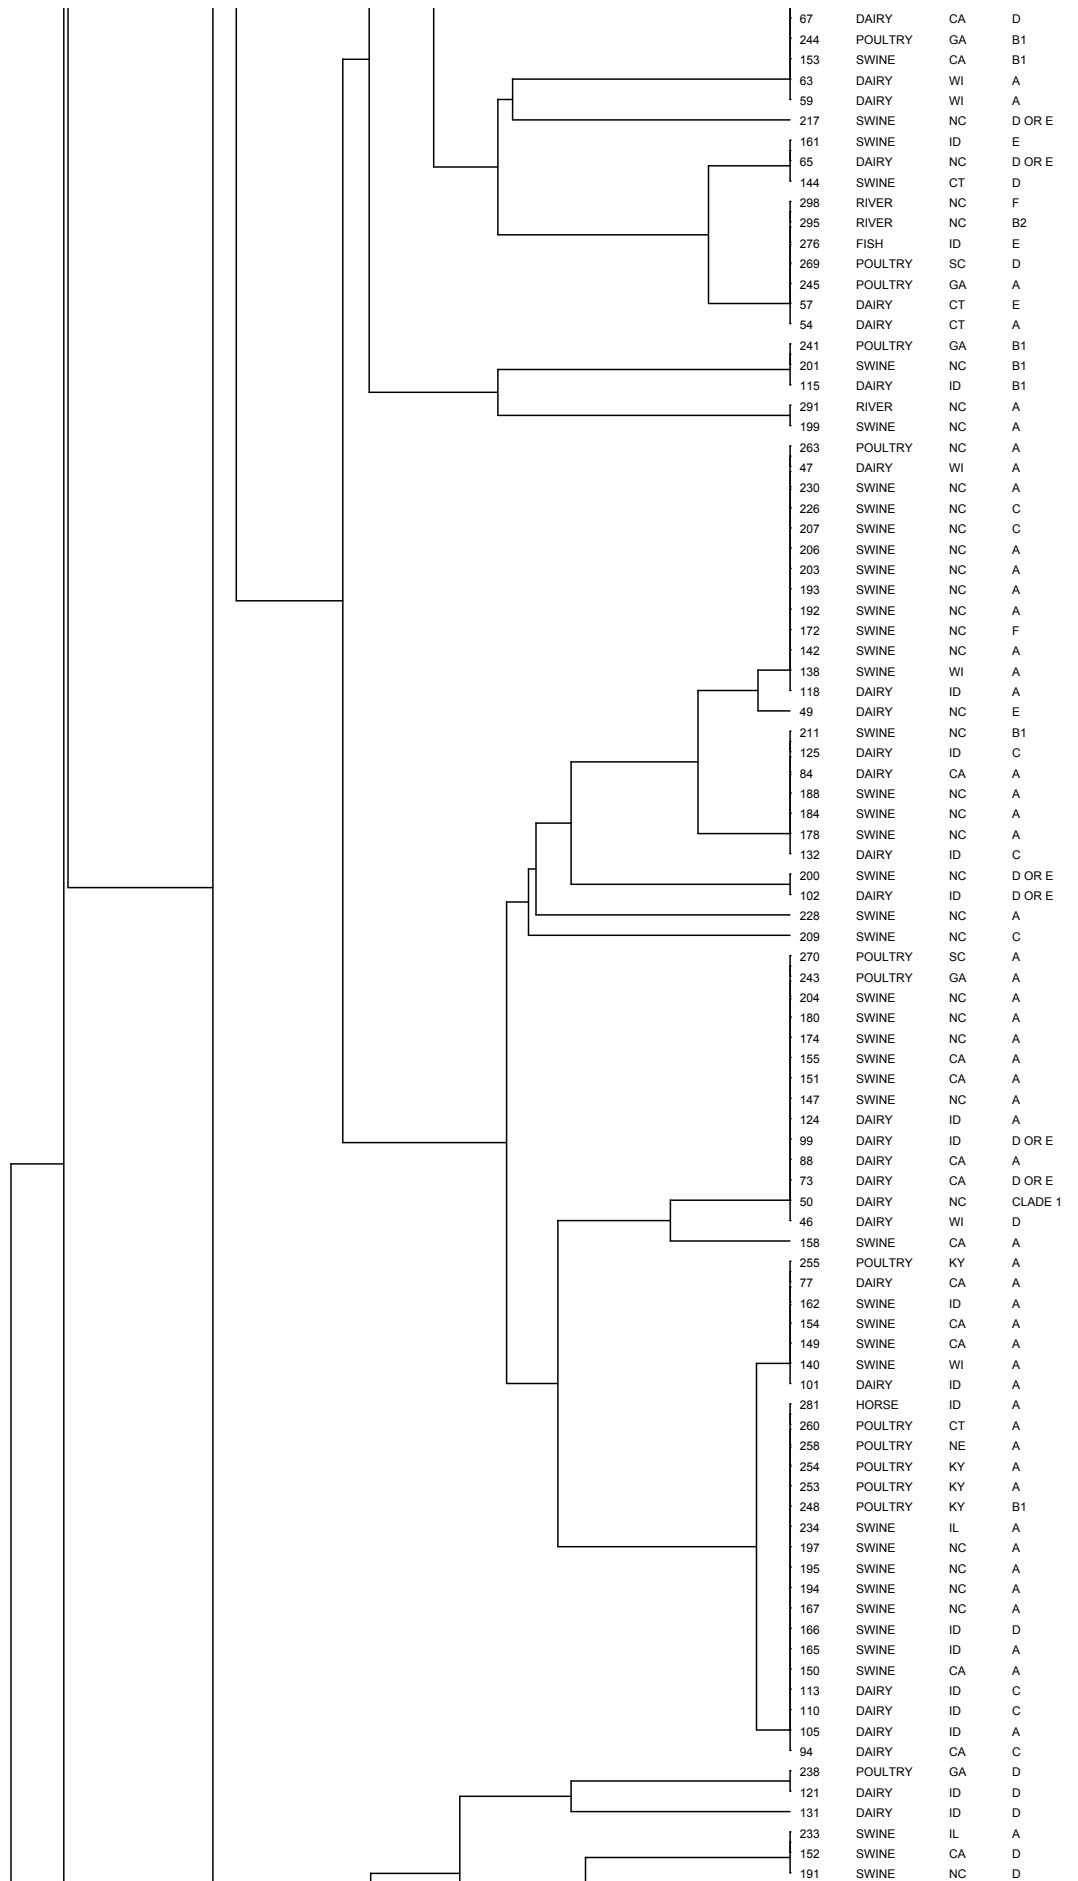

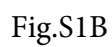

Fig.S1B

Supplement: s1 [file s1]
